# Supplementary material for: Antioxidant activity of selected natural polyphenolic compounds from soybean via peroxyl radical scavenging
Source: Royal Society of Chemistry journal article supplement (doi:10.1039/c4ra04758c), 2014-01-01
Supplement: c4ra04758c1.pdf [file c4ra04758c1.pdf]

## Antioxidant activity of selected natural polyphenolic compounds from Soybean via peroxy radicals scavenging.

Carolina Caicedo,<sup>a</sup> Cristina Iuga,<sup>b</sup> Romina Castañeda-Arriaga<sup>a</sup> and J. Raúl Alvarez-Idaboy<sup>\*a</sup>

<sup>a</sup>Departamento de Física y Química Teórica, Facultad de Química,  
Universidad Nacional Autónoma de México.

Circuito Exterior SN. Ciudad Universitaria, C.P. 04510 Coyoacán, D.F. México.

<sup>b</sup>Universidad Autónoma Metropolitana-Xochimilco, Calzada del  
Hueso 1100, 04960 México, D.F., Mexico.

\*E-mail: jidaboy@unam.mx

### TABLE OF CONTENTS.

|                   |                                                                                                                                                                                                                                                                                                                                                           |    |
|-------------------|-----------------------------------------------------------------------------------------------------------------------------------------------------------------------------------------------------------------------------------------------------------------------------------------------------------------------------------------------------------|----|
| <b>Figure S1.</b> | a) Optimized structures of the polyphenolic compounds under study. b) Dihedral angles determination.....                                                                                                                                                                                                                                                  | S2 |
| <b>Table S1.</b>  | Theoretical main geometrical parameters (bond length and dihedral angles) of the compounds under study.....                                                                                                                                                                                                                                               | S2 |
| <b>Table S1.</b>  | Gibbs free energies for the deprotonated structures of each molecule.....                                                                                                                                                                                                                                                                                 | S3 |
| <b>Table S3.</b>  | Gibbs free energy of reaction ( $\Delta G$ ) and activation ( $\Delta G^\ddagger$ ), in kcal/mol, rate constants ( $k$ ), in $M^{-1}.s^{-1}$ , relative branching ratios ( $\Gamma$ ), and imaginary frequencies for the HT channels in the reaction of neutral polyphenolic compounds with the peroxy free radicals, in water at 298.15 K.....           | S4 |
| <b>Table S4.</b>  | Gibbs free energy of reaction ( $\Delta G$ ) and activation ( $\Delta G^\ddagger$ ), in kcal/mol, rate constants ( $k$ ), in $M^{-1}.s^{-1}$ , relative branching ratios ( $\Gamma$ ), and imaginary frequencies for the HT channels in the reaction of neutral polyphenolic compounds with the peroxy free radicals, in pentylethanoate at 298.15 K..... | S5 |
| <b>Figure S2.</b> | Transition structures (TS) in the neutral Genistein against for the HT mechanism.....                                                                                                                                                                                                                                                                     | S6 |
| <b>Table S5.</b>  | Gibbs free energy of reaction ( $\Delta G$ ) and activation ( $\Delta G^\ddagger$ ), in kcal/mol, rate constants ( $k$ ), in $M^{-1}.s^{-1}$ , relative branching ratios ( $\Gamma$ ), and imaginary frequencies for the HT channels in the reaction of deprotonated polyphenolic compounds with the peroxy free radicals, in water at 298.15 K.....      | S7 |
| <b>Figure S3.</b> | Transition structures (TS) in the deprotonated Genistein against for the HT mechanism.....                                                                                                                                                                                                                                                                | S8 |
| <b>Table S6.</b>  | T1 diagnostic for transition states involved H abstractions by $\bullet OOH$ radical.....                                                                                                                                                                                                                                                                 | S9 |

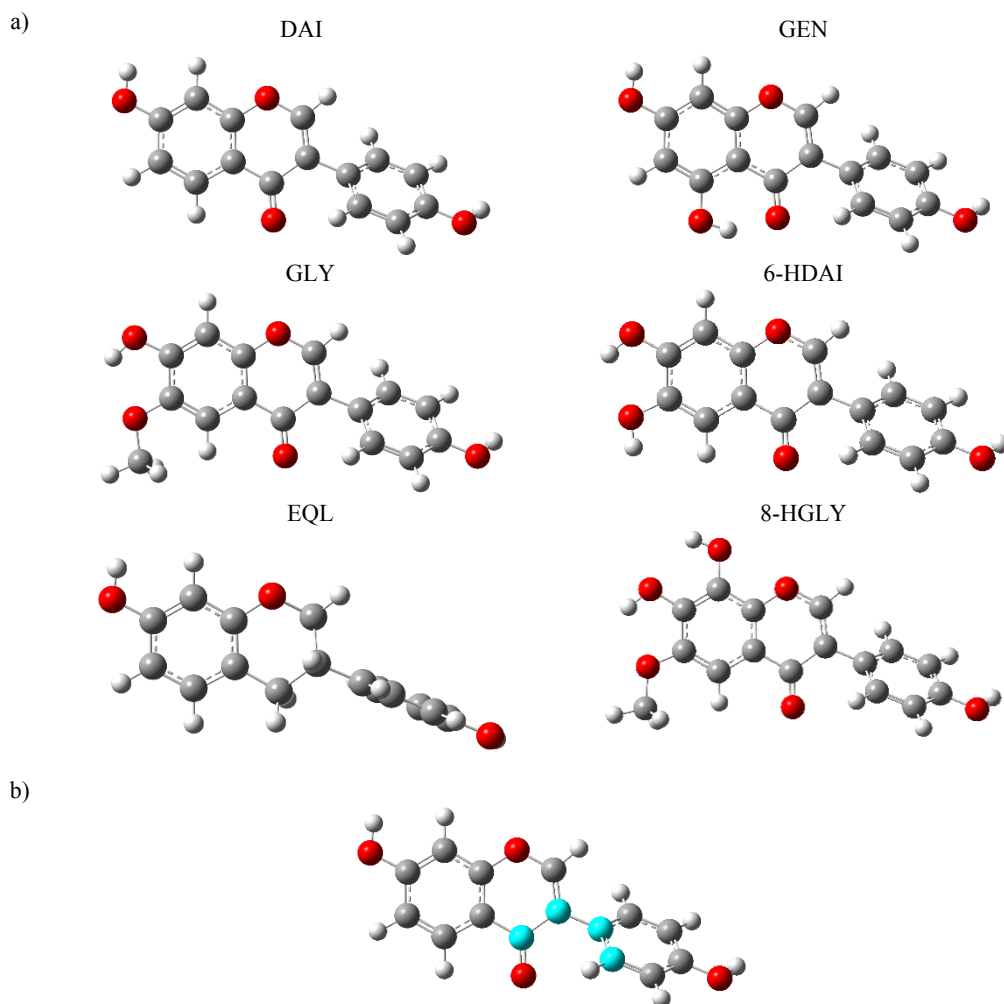

**Figure S1.** a) Optimized structures of the polyphenolic compounds under study in aqueous media. b) Dihedral angles determination.

**Table S1.** Theoretical main geometrical parameters (bond length and dihedral angles) of the compounds under study.

| Neutral Compounds | C-O-C <sup>a</sup>               | C=O          | C-OH         | O-H          | C-C-C=C <sup>b</sup> | C-C-C=C <sup>b</sup>   |
|-------------------|----------------------------------|--------------|--------------|--------------|----------------------|------------------------|
|                   | (Å) In water and pentylethanoate |              |              |              | (°) In water         | (°) In pentylethanoate |
| DAI               | 1.35 ± 0.001                     | 1.23 ± 0.002 | 1.36 ± 0.001 | 0.96 ± 0.002 | -50.55               | -47.32                 |
| GLY               | 1.35 ± 0.001                     | 1.23 ± 0.002 | 1.36 ± 0.001 | 0.96 ± 0.002 | -51.86               | -46.80                 |
| EQL               | 1.35 ± 0.001                     | 1.23 ± 0.002 | 1.36 ± 0.001 | 0.96 ± 0.002 | -121.1               | -121.71                |
| GEN               | 1.35 ± 0.001                     | 1.23 ± 0.002 | 1.36 ± 0.001 | 0.96 ± 0.002 | -49.36               | -47.63                 |
| 6-HDAI            | 1.35 ± 0.001                     | 1.23 ± 0.002 | 1.36 ± 0.001 | 0.96 ± 0.002 | -49.94               | -46.42                 |
| 8-HGLY            | 1.35 ± 0.001                     | 1.23 ± 0.002 | 1.36 ± 0.001 | 0.96 ± 0.002 | -51.07               | -47.82                 |

<sup>a</sup>Average C-O-C bond length. <sup>b</sup>C-C-C=C dihedral angle marked in color aqua in the Figure S1b.

**Table S2.** Gibbs free energies for the deprotonated structures of each molecule.

| Monoanionic Species | Deprotonated channel | G (kcal/mol) In water |
|---------------------|----------------------|-----------------------|
| EQL                 | 7 OH                 | -803.37               |
|                     | 4'OH                 | -803.37               |
| DAI                 | 7 OH                 | -878.06               |
|                     | 4'OH                 | -878.06               |
| GLY                 | 7 OH                 | -992.58               |
|                     | 4'OH                 | -992.56               |
| GEN                 | 7 OH                 | -953.31               |
|                     | 5 OH                 | -953.31               |
|                     | 4'OH                 | -953.31               |
| 6-HDAI              | 7 OH                 | -953.31               |
|                     | 6 OH                 | -953.31               |
|                     | 4'OH                 | -953.30               |
| 8-HGLY              | 7 OH                 | -1067.82              |
|                     | 8 OH                 | -1067.82              |
|                     | 4'OH                 | -1067.81              |

| Dianionic Species | Deprotonated channels | G (kcal/mol) In water |
|-------------------|-----------------------|-----------------------|
| GEN               | 7 OH - 4'OH           | -952.86               |
|                   | 7 OH - 5 OH           | -952.85               |
| 6-HDAI            | 7 OH - 4'OH           | -952.85               |
|                   | 7 OH - 6 OH           | -952.84               |
| 8-HGLY            | 7 OH - 4'OH           | -1067.36              |
|                   | 7 OH - 8 OH           | -1067.35              |

**Table S3.** Gibbs free energy of reaction ( $\Delta G$ ) and activation ( $\Delta G^\ddagger$ ), in kcal/mol, rate constants ( $k$ ), in  $M^{-1}.s^{-1}$ , relative branching ratios ( $\Gamma$ ), and imaginary frequencies for the HT channels in the reaction of neutral polyphenolic compounds with the peroxy free radicals, in water at 298.15 K.

| Neutral Compound         | Channel | $\Delta G$ | $\Delta G^\ddagger$ | $\Delta H^\ddagger$ | Tunnel | $k$                   | $\Gamma$ | i Freq |
|--------------------------|---------|------------|---------------------|---------------------|--------|-----------------------|----------|--------|
| <b>•OOH</b>              |         |            |                     |                     |        |                       |          |        |
| DAI                      | 7 (OH)  | 6.78       | 25.73               | 14.55               | 399.3  | $2.51 \times 10^{-2}$ | 0.1      | 2761   |
|                          | 4'(OH)  | -0.16      | 21.83               | 10.34               | 757.6  | $3.44 \times 10^1$    | 99.9     | 2596   |
| EQL                      | 7 (OH)  | -1.57      | 19.61               | 9.39                | 908.6  | $1.75 \times 10^3$    | 96.0     | 2753   |
|                          | 4'(OH)  | -0.84      | 21.06               | 9.79                | 440.1  | $7.33 \times 10^1$    | 4.0      | 2475   |
| GLY                      | 7 (OH)  | 5.39       | 20.97               | 8.78                | 29.6   | $5.74 \times 10$      | 3.0      | 2993   |
|                          | 4'(OH)  | 0.36       | 20.16               | 8.14                | 247.4  | $1.88 \times 10^2$    | 97.0     | 2569   |
| GEN                      | 7 (OH)  | 8.05       | 26.71               | 15.22               | 507.9  | $6.10 \times 10^{-3}$ | 0.0      | 3156   |
|                          | 5 (OH)  | 8.49       | 29.75               | 18.70               | 3953.3 | $2.80 \times 10^{-4}$ | 0.0      | 3237   |
|                          | 4'(OH)  | 0.19       | 21.54               | 10.42               | 594.5  | $4.37 \times 10^1$    | 100.0    | 2529   |
| 6-HDAI                   | 7 (OH)  | 0.73       | 24.04               | 12.09               | 3352.7 | $3.65 \times 10$      | 0.9      | 2892   |
|                          | 6 (OH)  | -2.09      | 19.92               | 8.65                | 280.9  | $3.20 \times 10^2$    | 76.1     | 2426   |
|                          | 4'(OH)  | -0.22      | 21.09               | 10.08               | 613.9  | $9.71 \times 10^1$    | 23.1     | 2561   |
| 8-HGLY                   | 7 (OH)  | 3.70       | 19.70               | 8.22                | 112.1  | $1.86 \times 10^2$    | 23.0     | 2892   |
|                          | 8 (OH)  | -3.32      | 19.07               | 7.65                | 93.5   | $4.47 \times 10^2$    | 55.4     | 2158   |
|                          | 4'(OH)  | -0.37      | 21.11               | 10.40               | 1143.1 | $1.74 \times 10^2$    | 21.6     | 2707   |
| <b>•OOCH<sub>3</sub></b> |         |            |                     |                     |        |                       |          |        |
| DAI                      | 7 (OH)  | 7.31       | 25.73               | 14.55               | 266.0  | $1.67 \times 10^{-2}$ | 0.1      | 2847   |
|                          | 4'(OH)  | 0.37       | 22.26               | 10.54               | 715.0  | $1.57 \times 10^1$    | 99.9     | 2604   |
| EQL                      | 7 (OH)  | -0.60      | 20.59               | 9.41                | 2237.5 | $8.23 \times 10^2$    | 76.1     | 3227   |
|                          | 4'(OH)  | 0.13       | 20.91               | 9.55                | 1201.6 | $2.58 \times 10^2$    | 23.9     | 3035   |
| GLY                      | 7 (OH)  | 6.36       | 21.42               | 8.20                | 7.0    | $9.41 \times 10^{-1}$ | 1.6      | 2965   |
|                          | 4'(OH)  | 1.33       | 21.19               | 8.13                | 434.6  | $5.81 \times 10^1$    | 98.4     | 3144   |
| GEN                      | 7 (OH)  | 9.02       | 26.33               | 14.13               | 62.4   | $1.42 \times 10^{-3}$ | 0.0      | 2883   |
|                          | 5 (OH)  | 9.46       | 29.51               | 18.25               | 643.1  | $6.08 \times 10^{-5}$ | 0.0      | 2941   |
|                          | 4'(OH)  | 1.15       | 22.25               | 10.44               | 2414.5 | $5.37 \times 10^1$    | 100.0    | 3267   |
| 6-HDAI                   | 7 (OH)  | 1.70       | 23.43               | 11.35               | 1353.9 | $4.13 \times 10$      | 0.6      | 2920   |
|                          | 6 (OH)  | -1.12      | 19.70               | 7.57                | 249.5  | $4.12 \times 10^2$    | 63.3     | 2611   |
|                          | 4'(OH)  | 0.75       | 21.32               | 10.02               | 2190.8 | $2.35 \times 10^2$    | 36.1     | 3261   |
| 8-HGLY                   | 7 (OH)  | -2.74      | 19.40               | 7.06                | 114.1  | $3.13 \times 10^2$    | 29.3     | 2328   |
|                          | 8 (OH)  | -2.36      | 18.84               | 6.40                | 93.2   | $6.58 \times 10^2$    | 61.6     | 2368   |
|                          | 4'(OH)  | 0.24       | 21.90               | 10.30               | 2404.8 | $9.70 \times 10^1$    | 9.1      | 3184   |

**Table S4.** Gibbs free energy of reaction ( $\Delta G$ ) and activation ( $\Delta G^\ddagger$ ), in kcal/mol, rate constants ( $k$ ), in  $M^{-1}.s^{-1}$ , relative branching ratios ( $\Gamma$ ), and imaginary frequencies for the HT channels in the reaction of neutral poliphenolic compounds with the peroxy free radicals, in pentylethanoate at 298.15 K.

| Neutral Compound         | Channel | $\Delta G$ | $\Delta G^\ddagger$ | $\Delta H^\ddagger$ | Tunnel | $k$                   | $\Gamma$ | Freq i |
|--------------------------|---------|------------|---------------------|---------------------|--------|-----------------------|----------|--------|
| <b>•OOH</b>              |         |            |                     |                     |        |                       |          |        |
| DAI                      | 7 (OH)  | 6.75       | 23.78               | 13.24               | 104.1  | $1.76 \times 10^{-1}$ | 0.4      | 2430   |
|                          | 4' (OH) | 0.75       | 20.37               | 9.32                | 81.7   | $4.36 \times 10^1$    | 99.6     | 2081   |
| EQL                      | 7 (OH)  | 0.69       | 19.91               | 9.23                | 116.6  | $1.35 \times 10^2$    | 73.7     | 2213   |
|                          | 4' (OH) | 1.10       | 20.24               | 9.36                | 72.5   | $4.82 \times 10^1$    | 26.3     | 2061   |
| GLY                      | 7 (OH)  | 4.93       | 24.02               | 12.69               | 215.9  | $2.43 \times 10^{-1}$ | 0.1      | 2515   |
|                          | 4' (OH) | 0.67       | 19.25               | 9.48                | 70.3   | $2.49 \times 10^2$    | 99.9     | 2010   |
| GEN                      | 7 (OH)  | 9.19       | 25.09               | 14.11               | 49.0   | $9.06 \times 10^{-3}$ | 0.1      | 2497   |
|                          | 5 (OH)  | 15.90      | 29.96               | 18.85               | 9.0    | $4.49 \times 10^{-7}$ | 0.0      | 3446   |
|                          | 4' (OH) | 1.44       | 21.20               | 10.10               | 92.3   | $1.21 \times 10^1$    | 99.9     | 2081   |
| 6-HDAI                   | 7 (OH)  | 0.17       | 24.23               | 12.69               | 1609.8 | $1.27 \times 10$      | 0.6      | 2537   |
|                          | 6 (OH)  | -2.53      | 19.40               | 7.89                | 60.9   | $1.67 \times 10^2$    | 82.1     | 1996   |
|                          | 4' (OH) | 0.73       | 20.48               | 9.45                | 79.5   | $3.52 \times 10^1$    | 17.3     | 2057   |
| 8-HGLY                   | 7 (OH)  | -1.97      | 20.00               | 8.12                | 226.6  | $9.64 \times 10^1$    | 69.2     | 2428   |
|                          | 8 (OH)  | -1.82      | 19.83               | 8.45                | 38.0   | $1.62 \times 10^1$    | 11.6     | 1840   |
|                          | 4' (OH) | 0.93       | 20.77               | 8.90                | 62.8   | $2.67 \times 10^1$    | 19.2     | 2025   |
| <b>•OOCH<sub>3</sub></b> |         |            |                     |                     |        |                       |          |        |
| DAI                      | 7 (OH)  | 8.64       | 24.65               | 12.93               | 27.1   | $1.05 \times 10^{-2}$ | 0.1      | 2447   |
|                          | 4' (OH) | 2.64       | 21.58               | 9.69                | 134.0  | $9.27 \times 10$      | 99.9     | 2490   |
| EQL                      | 7 (OH)  | 2.58       | 21.08               | 9.86                | 152.1  | $6.47 \times 10^1$    | 55.1     | 2524   |
|                          | 4' (OH) | 2.99       | 20.35               | 9.75                | 123.8  | $5.27 \times 10^1$    | 44.9     | 2516   |
| GLY                      | 7 (OH)  | 6.82       | 24.28               | 12.88               | 75.9   | $5.51 \times 10^{-2}$ | 0.2      | 2511   |
|                          | 4' (OH) | 2.56       | 21.19               | 10.00               | 171.8  | $2.30 \times 10^1$    | 99.8     | 2502   |
| GEN                      | 7 (OH)  | 11.08      | 25.24               | 13.48               | 6.4    | $9.22 \times 10^{-4}$ | 0.1      | 2443   |
|                          | 5 (OH)  | 17.79      | 33.97               | 23.41               | 39.3   | $1.90 \times 10^{-9}$ | 0.0      | 2527   |
|                          | 4' (OH) | 3.33       | 22.69               | 10.43               | 151.6  | $1.61 \times 10$      | 99.9     | 2507   |
| 6-HDAI                   | 7 (OH)  | 2.06       | 25.41               | 12.74               | 707.1  | $7.62 \times 10^{-2}$ | 0.1      | 2479   |
|                          | 6 (OH)  | -0.64      | 19.76               | 6.41                | 71.9   | $1.07 \times 10^2$    | 95.2     | 2299   |
|                          | 4' (OH) | 2.62       | 21.98               | 9.96                | 151.2  | $5.33 \times 10$      | 4.7      | 2476   |
| 8-HGLY                   | 7 (OH)  | -0.08      | 20.23               | 8.10                | 97.6   | $6.60 \times 10^1$    | 43.0     | 2205   |
|                          | 8 (OH)  | 0.07       | 19.79               | 19.79               | 58.1   | $8.25 \times 10^1$    | 53.8     | 2168   |
|                          | 4' (OH) | 2.82       | 22.06               | 22.06               | 160.9  | $4.95 \times 10$      | 3.2      | 2467   |

**Figure S2.** Transition structures (TS) in the neutral Genistein against  $\bullet\text{OOH}$  for the HT mechanism.

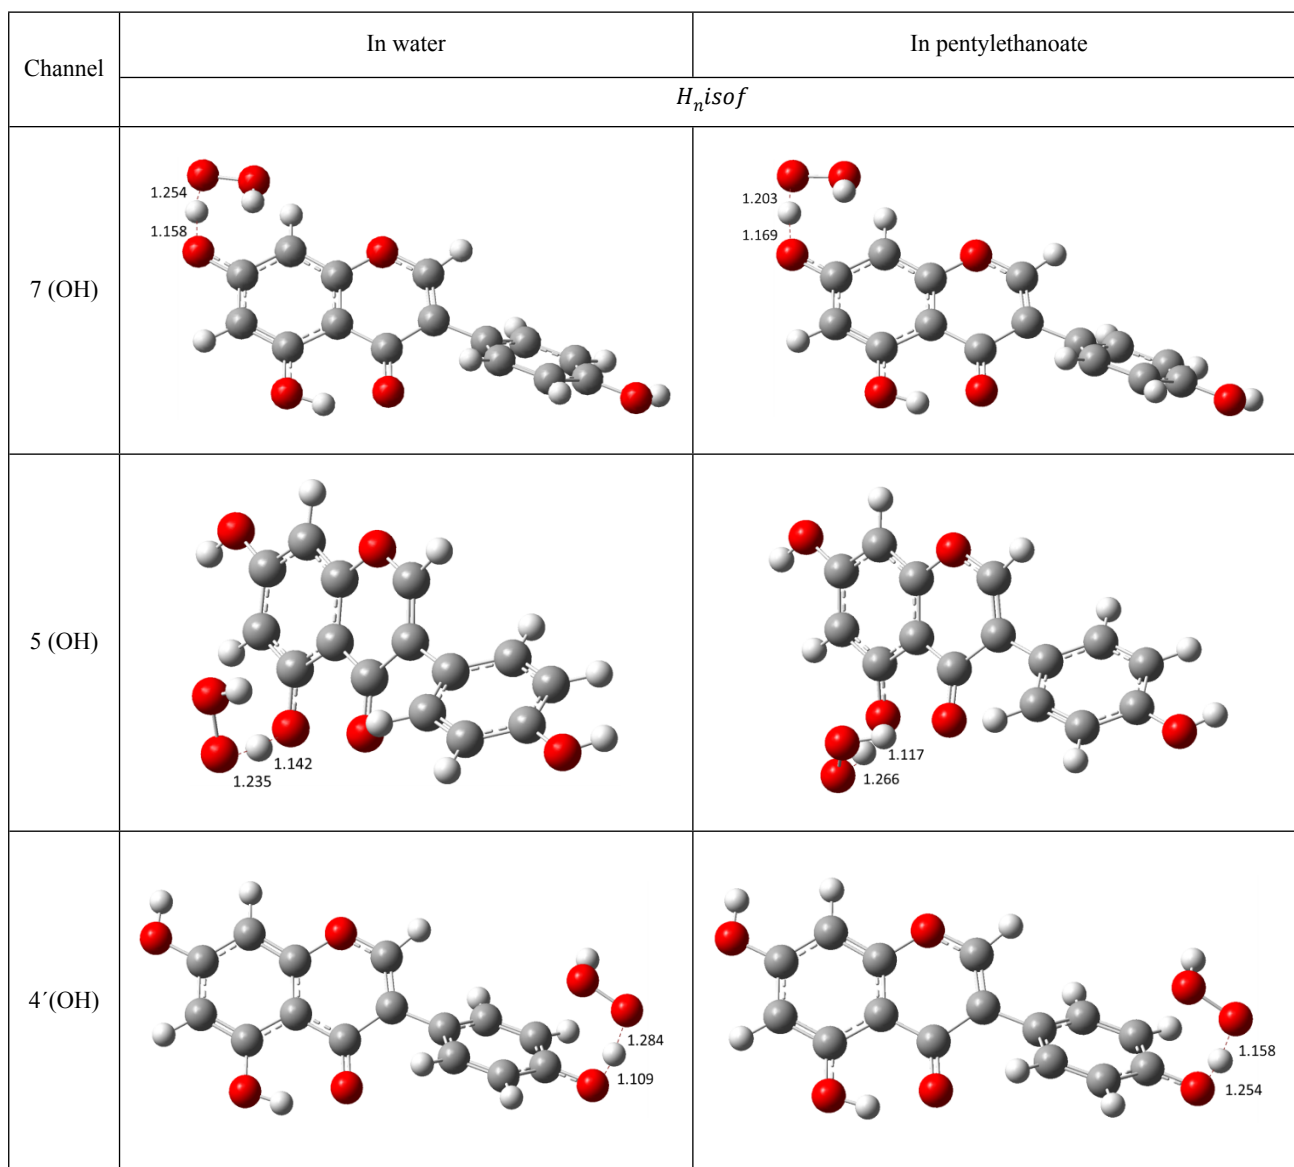

**Table S5.** Gibbs free energy of reaction ( $\Delta G$ ) and activation ( $\Delta G^\ddagger$ ), in kcal/mol, rate constants ( $k$ ), in  $M^{-1}.s^{-1}$ , relative branching ratios ( $\Gamma$ ), and imaginary frequencies for the HT channels in the reaction of deprotonated poliphenolic compounds with the peroxy free radicals, in water at 298.15 K.

| Monoanionic Species      | Channel | $\Delta G$ | $\Delta G^\ddagger$ | $\Delta H^\ddagger$ | Tunnel | $k$                   | $\Gamma$ | i Freq |
|--------------------------|---------|------------|---------------------|---------------------|--------|-----------------------|----------|--------|
| <b>•OOH</b>              |         |            |                     |                     |        |                       |          |        |
| DAI                      | 4'(OH)  | -0.75      | 21.37               | 9.85                | 720.1  | $7.10 \times 10^1$    | 100.0    | 2609   |
| EQL                      | 7(OH)   | -1.96      | 19.55               | 9.40                | 905.9  | $1.94 \times 10^3$    | 100.0    | 2738   |
| GLY                      | 4'(OH)  | -0.38      | 20.33               | 8.12                | 283.4  | $1.62 \times 10^2$    | 100.0    | 2566   |
| GEN                      | 5(OH)   | 6.70       | 27.68               | 16.97               | 2603.1 | $6.08 \times 10^{-3}$ | 0.0      | 3060   |
|                          | 4'(OH)  | -0.60      | 21.34               | 10.10               | 608.3  | $6.36 \times 10^1$    | 100.0    | 2527   |
| 6-HDAI                   | 6(OH)   | -6.25      | 17.71               | 6.59                | 522.2  | $2.48 \times 10^4$    | 99.8     | 3250   |
|                          | 4'(OH)  | -0.97      | 21.41               | 9.94                | 656.3  | $6.05 \times 10^1$    | 0.2      | 2562   |
| 8-HGLY                   | 8(OH)   | -13.45     | 14.35               | 2.88                | 15.2   | $2.10 \times 10^5$    | 100.0    | 2584   |
|                          | 4'(OH)  | 3.51       | 21.09               | 9.93                | 108.3  | $1.71 \times 10^1$    | 0.0      | 2568   |
| <b>•OOCH<sub>3</sub></b> |         |            |                     |                     |        |                       |          |        |
| DAI                      | 4'(OH)  | -0.22      | 21.90               | 10.05               | 685.0  | $1.76 \times 10^1$    | 100.0    | 2600   |
| EQL                      | 7(OH)   | -0.99      | 20.63               | 9.26                | 2569.2 | $8.82 \times 10^2$    | 100.0    | 3297   |
| GLY                      | 4'(OH)  | 0.59       | 20.95               | 7.97                | 641.2  | $1.29 \times 10^2$    | 100.0    | 3171   |
| GEN                      | 5(OH)   | 7.67       | 26.88               | 15.22               | 158.4  | $1.43 \times 10^{-3}$ | 0.0      | 2625   |
|                          | 4'(OH)  | 0.37       | 21.69               | 9.93                | 2553.5 | $1.46 \times 10^2$    | 100.0    | 3306   |
| 6-HDAI                   | 6(OH)   | -5.28      | 17.42               | 5.47                | 226.5  | $1.76 \times 10^4$    | 98.2     | 3241   |
|                          | 4'(OH)  | 0.00       | 21.03               | 9.70                | 1879.3 | $3.29 \times 10^2$    | 1.8      | 3113   |
| 8-HGLY                   | 8(OH)   | -12.48     | 13.34               | 1.13                | 2.8    | $2.13 \times 10^5$    | 100.0    | 2212   |
|                          | 4'(OH)  | 4.48       | 21.45               | 9.78                | 93.2   | $8.03 \times 10$      | 0.0      | 3229   |

| Dianionic Species        | Channel | $\Delta G$ | $\Delta G^\ddagger$ | $\Delta H^\ddagger$ | Tunnel  | $k$                   | i Freq |
|--------------------------|---------|------------|---------------------|---------------------|---------|-----------------------|--------|
| <b>•OOH</b>              |         |            |                     |                     |         |                       |        |
| GEN                      | 5(OH)   | 3.43       | 27.51               | 17.01               | 36081.4 | $1.12 \times 10^{-1}$ | 3163   |
| 6-HDAI                   | 6(OH)   | -6.41      | 17.86               | 6.51                | 659.8   | $2.46 \times 10^4$    | 3471   |
| 8-HGLY                   | 8(OH)   | -13.98     | 14.48               | 2.68                | 13.6    | $1.51 \times 10^5$    | 2669   |
| <b>•OOCH<sub>3</sub></b> |         |            |                     |                     |         |                       |        |
| GEN                      | 5(OH)   | 4.40       | 27.81               | 17.02               | 17731.4 | $3.31 \times 10^{-2}$ | 3181   |
| 6-HDAI                   | 6(OH)   | -5.44      | 17.16               | 5.33                | 224.5   | $2.70 \times 10^4$    | 3332   |
| 8-HGLY                   | 8(OH)   | -13.01     | 13.47               | 0.88                | 2.1     | $1.28 \times 10^5$    | 2239   |

**Figure S3.** Transition structures (TS) in the deprotonated Genistein against  $\bullet\text{OOH}$  for the HT mechanism.

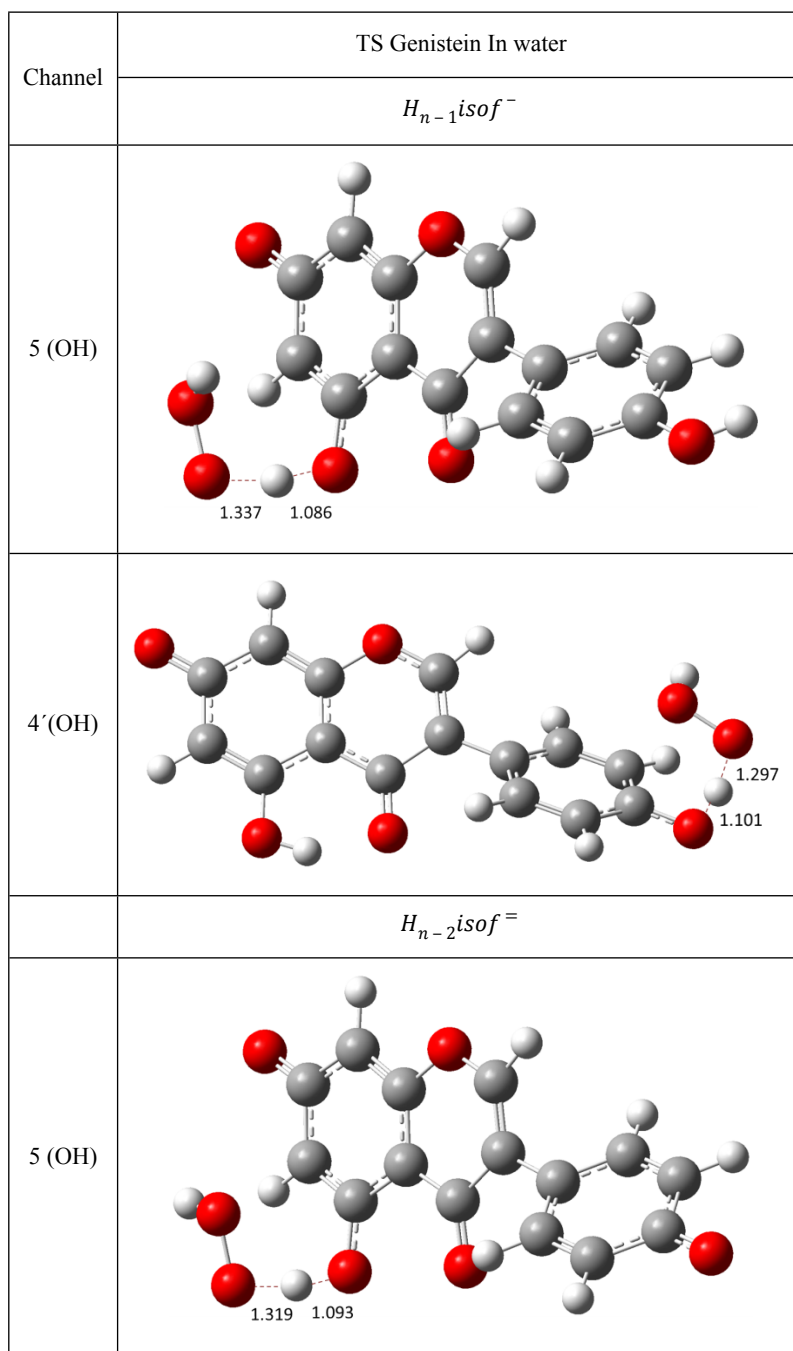



**Table S6.** T1 diagnostic for transition states involved H abstractions by  $\bullet\text{OOH}$  radical.

| Systems                                                                           | T1 Diagnostic |
|-----------------------------------------------------------------------------------|---------------|
| 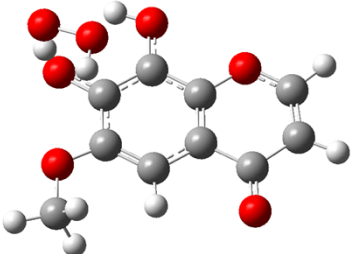 | 0.03365       |
|  | 0.03619       |
